# Supplementary material
Source: PubMed Central journal article supplement (PMC6697818)
Supplement: pnas.1904101116.sapp.pdf [file pnas.1904101116.sapp.pdf]

## SI Appendix

**A**

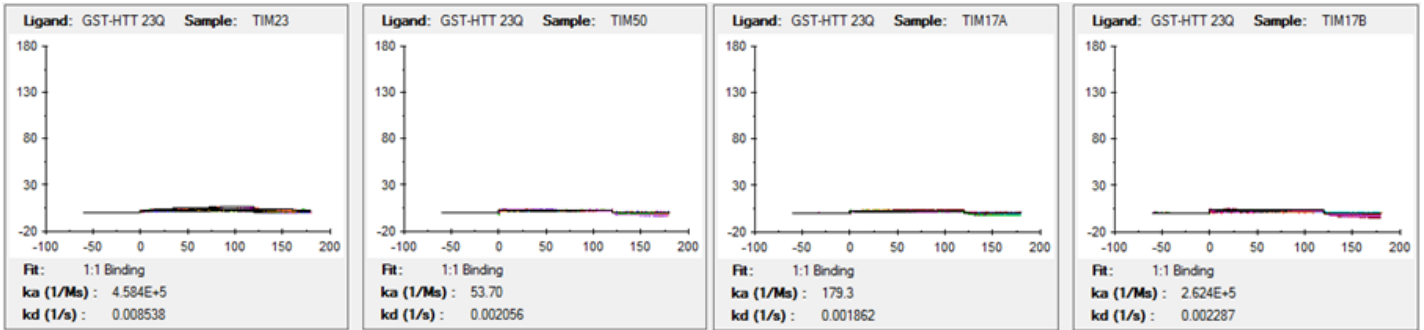

**B**

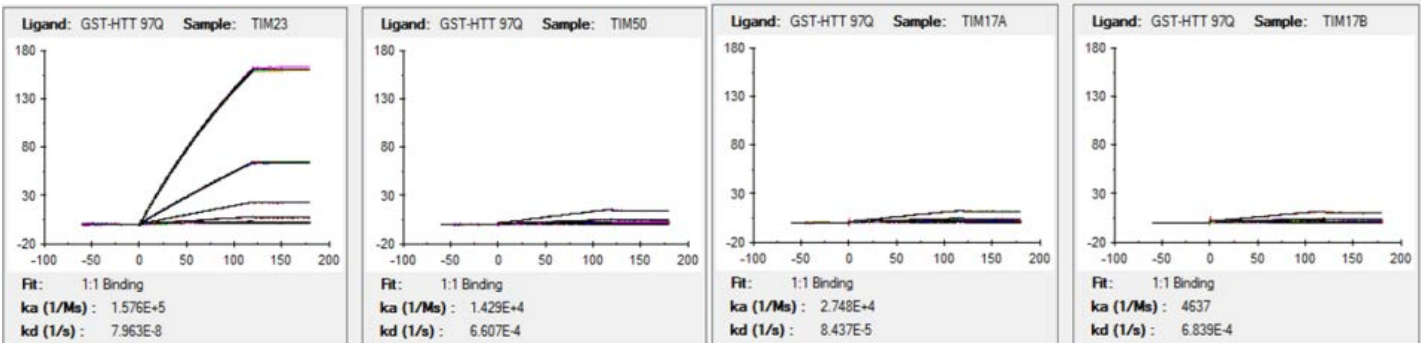

**Fig. S1.** Representative SPR sensorgrams displaying binding of TIM23, TIM50, TIM17A and TIM17B proteins (sample) to immobilized ligand wild type HTT (GST-HTT-23Q) (A) and mutant HTT (GST-HTT-2Q) (B).

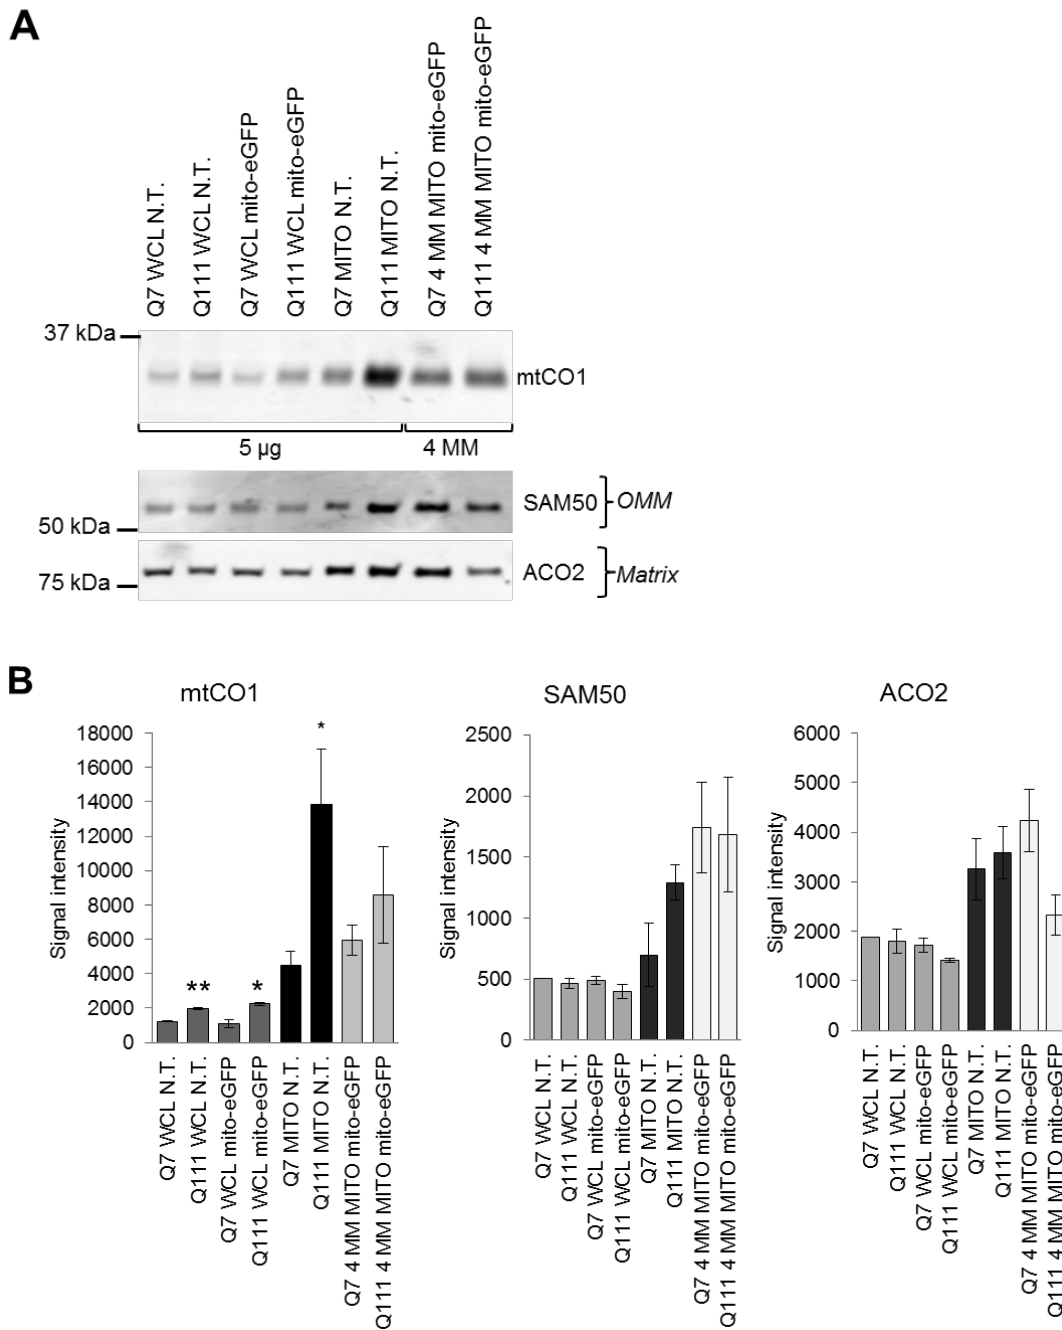

**Fig. S2.** The level of mtCO1 protein is equal in equivalent number of mitochondria from ST-Hdh-Q7/Q7 and -Q111/Q111 cells. Representative immunoblot (A) and quantification (B) of mtCO1 level in FACS sorted mitochondria isolated from mito-eGFP transfected cells. Four million (4 MM) eGFP labeled mitochondria and 5 µg protein samples were immunoblotted for mtCO1, and nuclearly-encoded matrix aconitase 2 (ACO2) and outer membrane (SAM50) proteins. WCL – whole cell lysate, MITO – mitochondria, N.T. – not transfected, OMM – outer mitochondrial membrane. (n=3, data shown as mean+s.e.m. \*\*  $P < 0.001$ , \*  $P < 0.05$ , t-Test).

**A**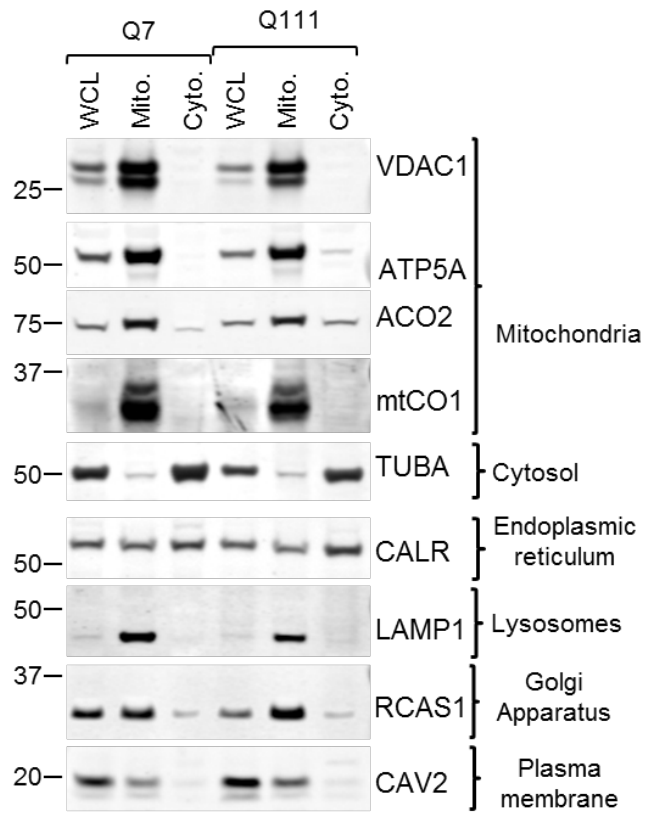**B**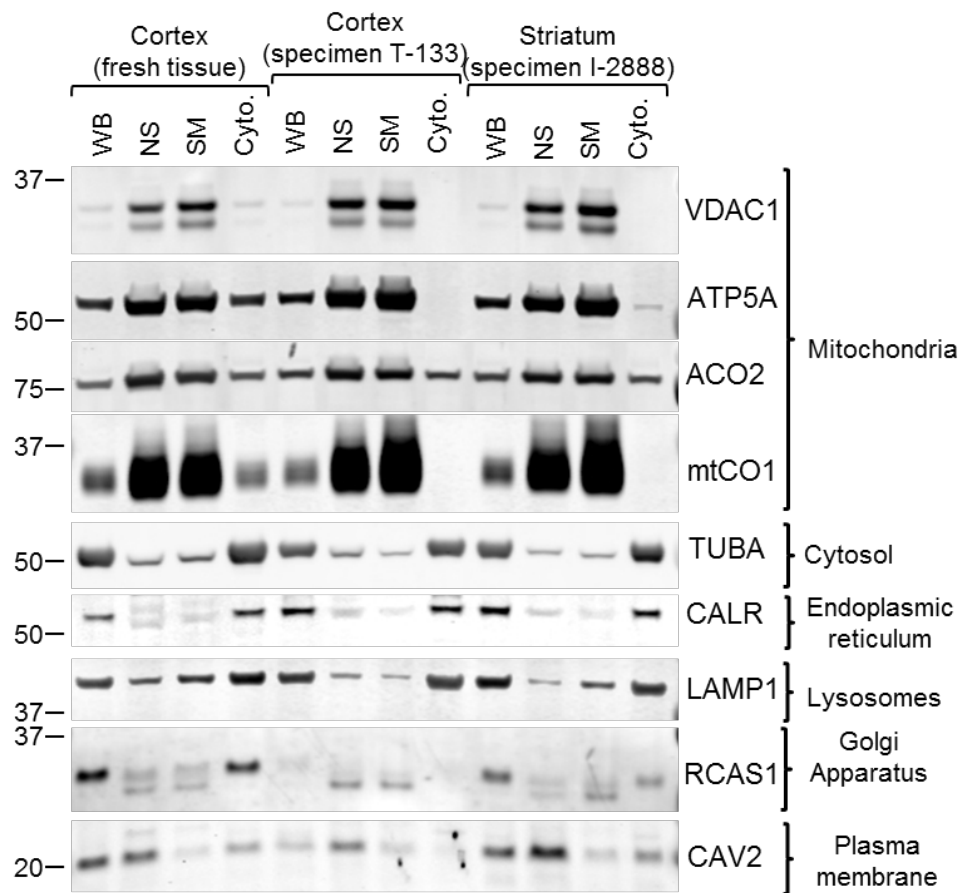

**Fig. S3. Purity of mitochondria enriched fractions.** (A) Representative immunoblot of Q7 and Q111 whole cell lysates (WCL), mitochondrial (Mito.) and cytosolic fractions (Cyto.) probed for mitochondrial markers (VDAC1, ATP5A, ACO2 and mtCO1) and typical mitochondrial fraction contaminants and contaminating organelles: cytosol (TUBA), endoplasmic reticulum (CALR), lysosomes (LAMP1), Golgi apparatus (RCAS1) and plasma membrane (CAV2). (B) Nonsynaptosomal (NS) and synaptosomal (SM) mitochondrial fractions isolated from fresh post-surgical cortex and frozen specimens of cortex and striatum (tissue blocks listed in Table 1) were tested for enrichment with mitochondrial markers and contamination with markers listed in (A) compared to whole brain homogenate (WB) and cytosolic fraction.

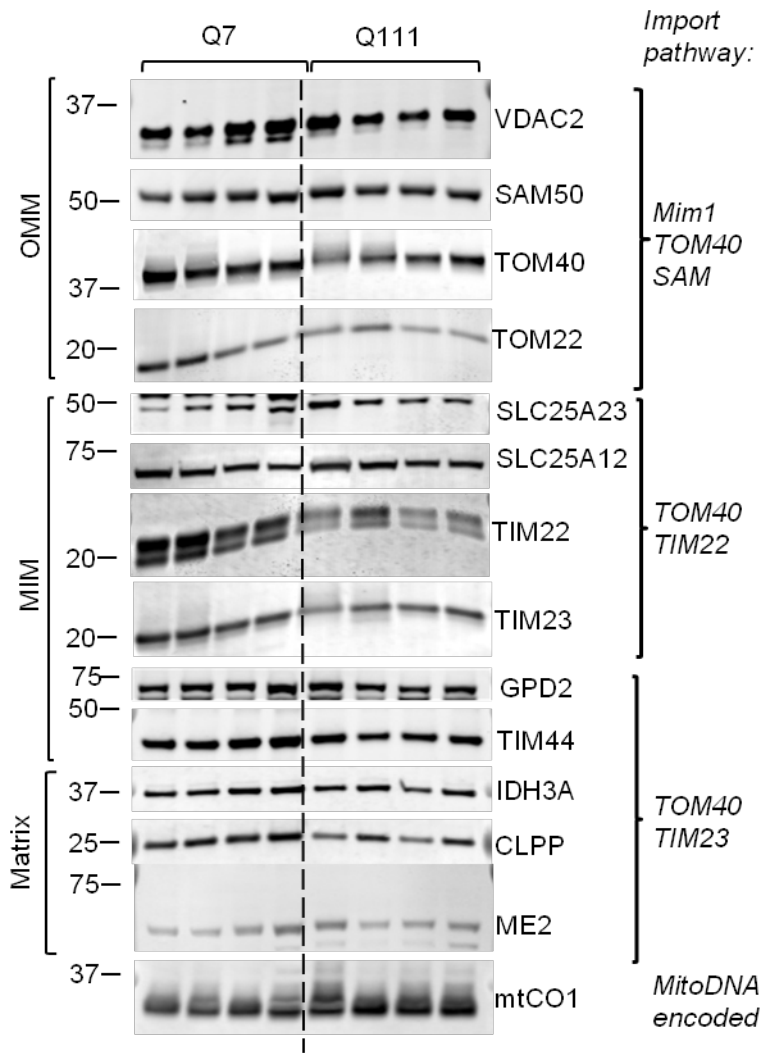

**Fig. S4. Representative immunoblots of mitochondrial proteins from Q7 and Q111 cells** (shown here to supplement Fig. 3E). Nuclearly encoded mitochondrial protein levels are reduced in the Q111 striatal cell line. OMM indicates outer mitochondrial membrane protein, MIM indicates mitochondrial inner membrane proteins, (n=4).

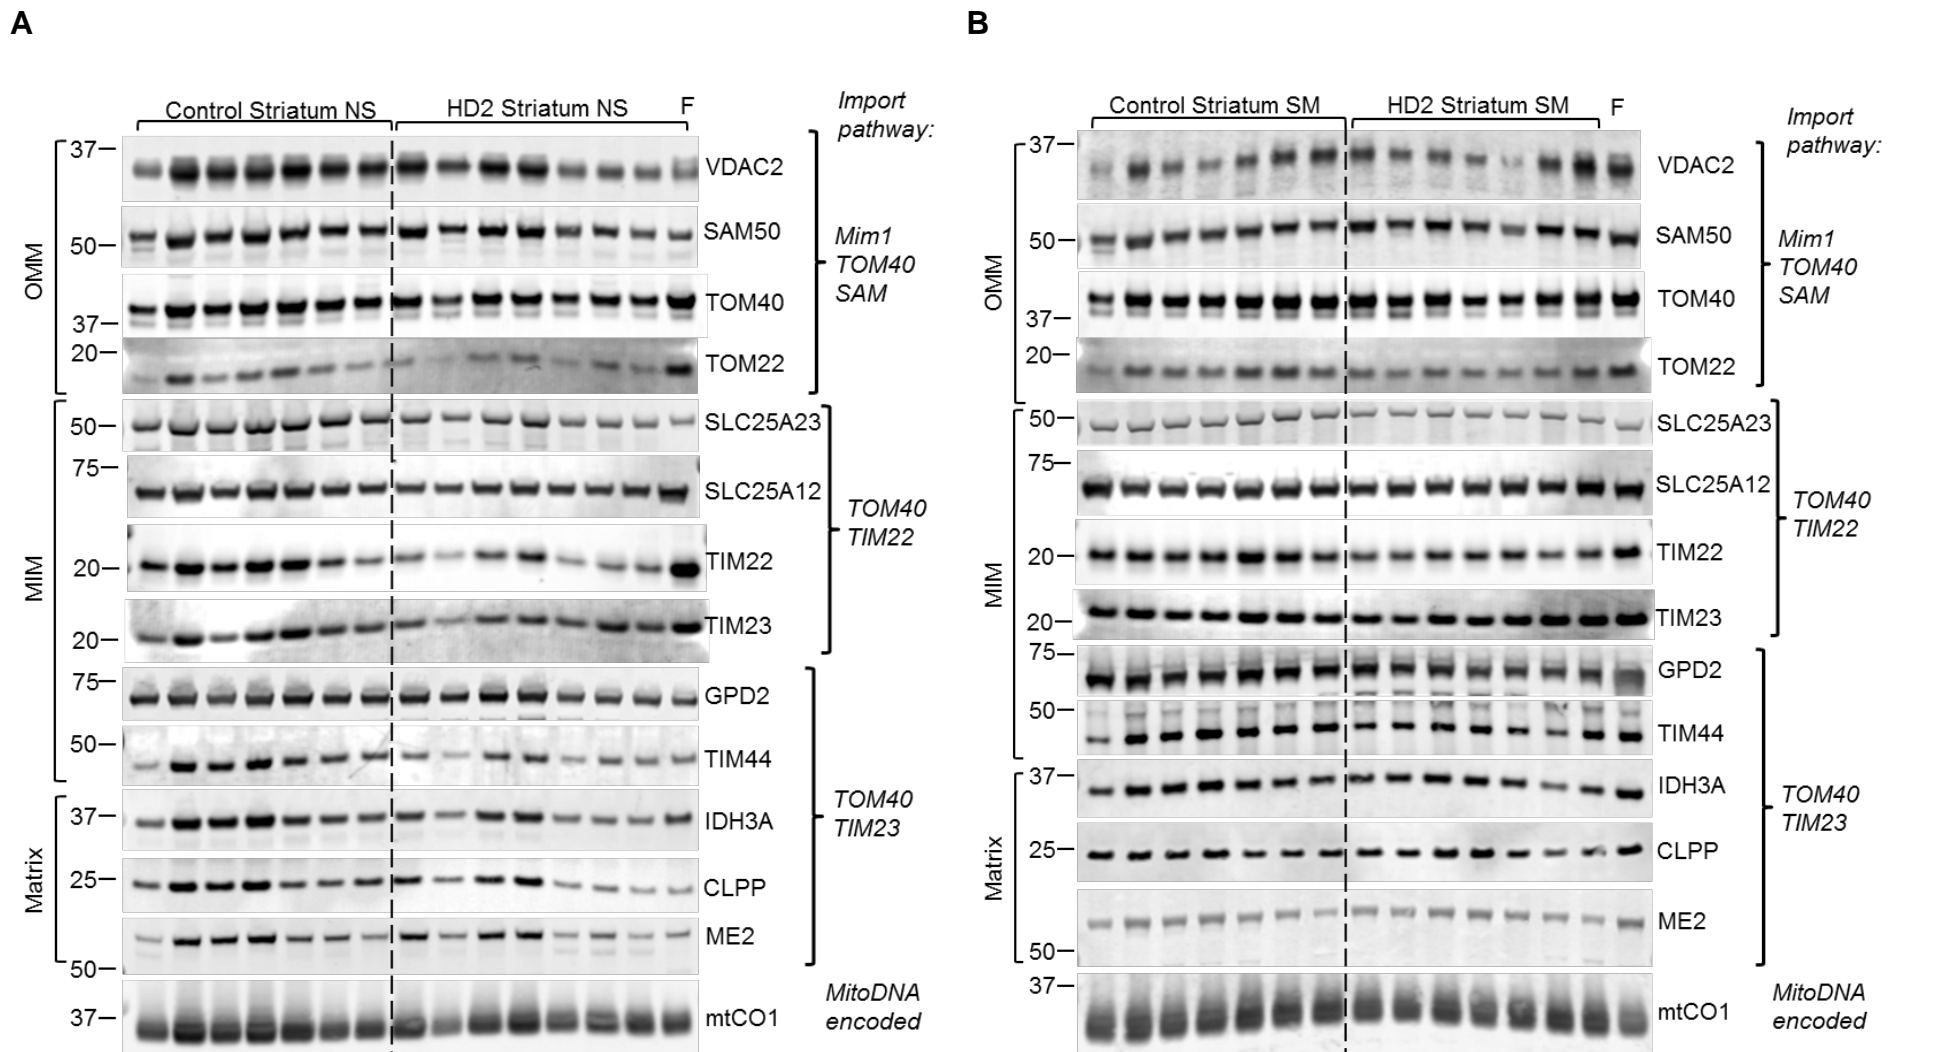

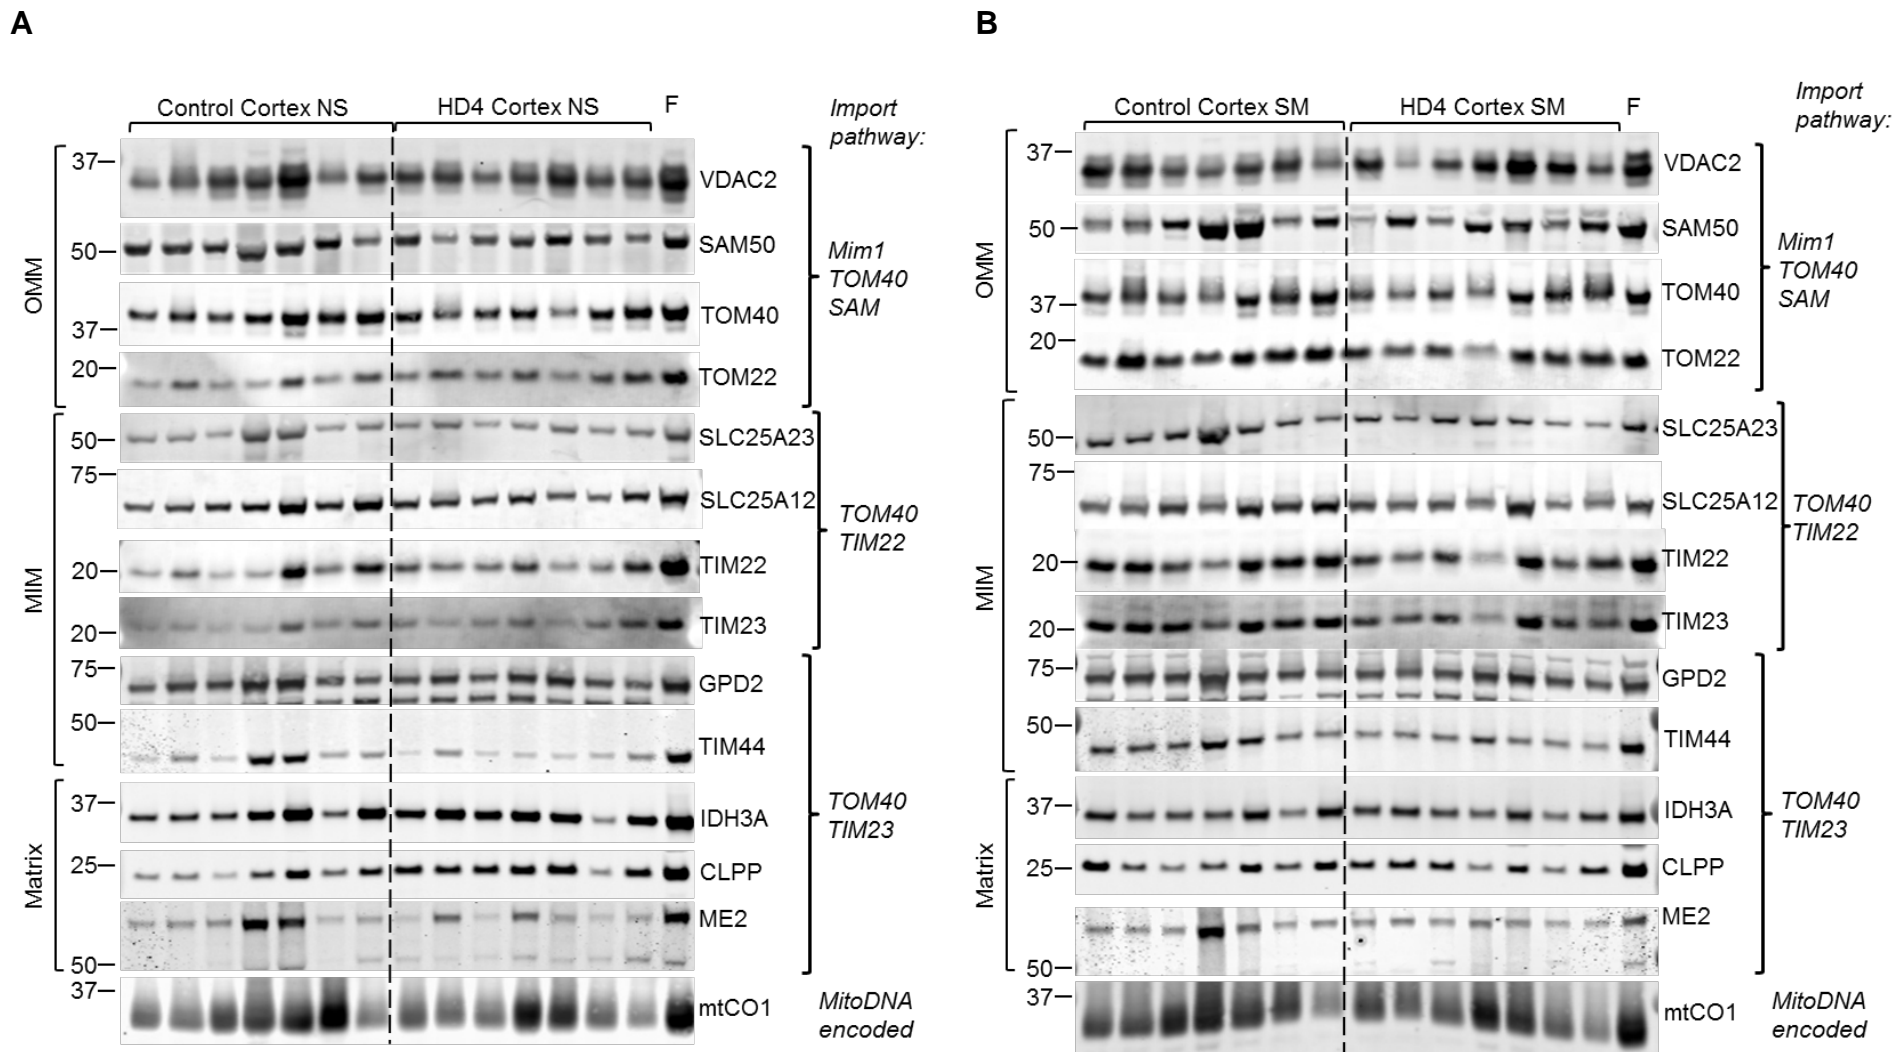

**Fig. S6. Protein dysregulation in cortical mitochondria of HD grade 4 patients.** Immunoblots of mitochondrial proteins in (A) nonsynaptosomal (NS) and (B) synaptosomal (SM) mitochondria (shown here to supplement Fig. 5A and 5C). OMM indicates outer mitochondrial membrane protein. MIM indicates mitochondrial inner membrane proteins. Samples prepared from cortex of non-HD patients were used as a control, and mitochondrial lysates from fresh (F) surgically resected cortex tissue of non-HD patients were included. Each lane represents the mitochondrial fraction from independent tissue block (n=7).

**A**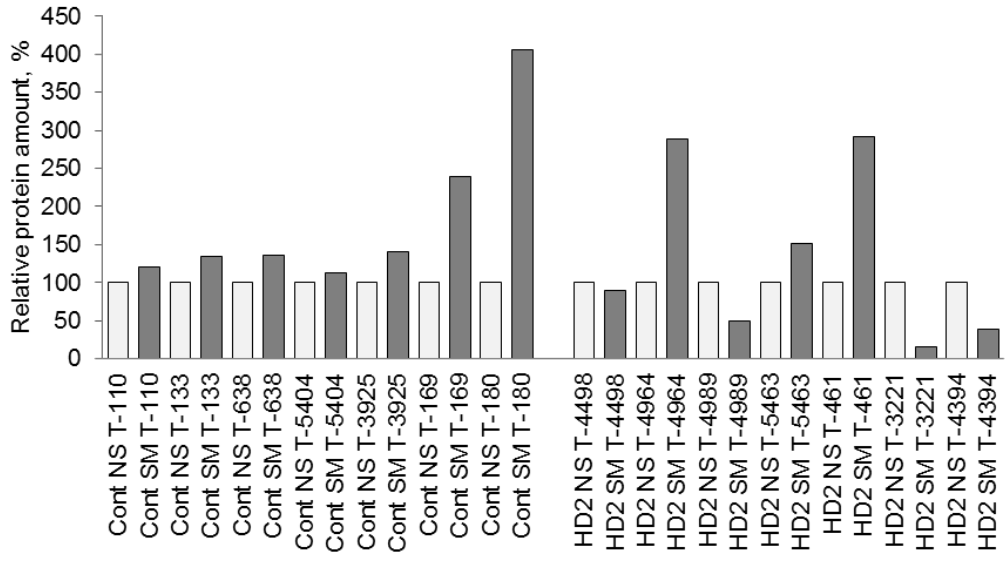**B**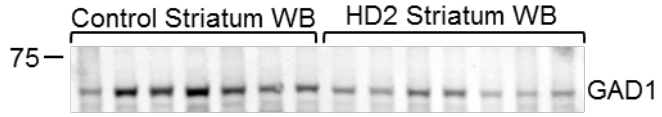**C**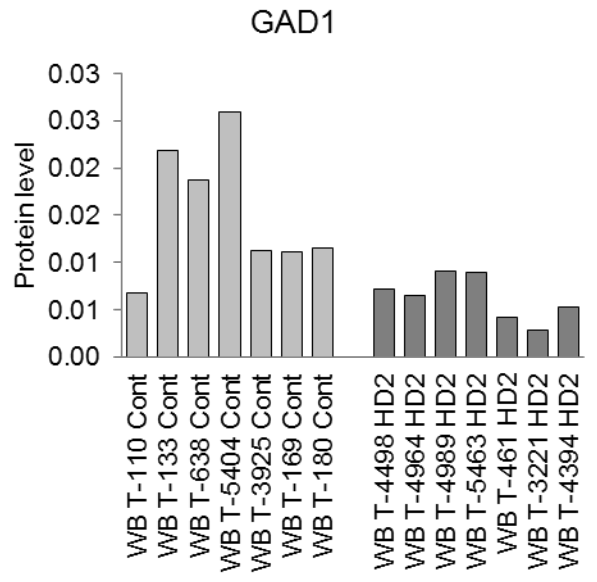

**Fig. S7. Synaptic mitochondria loss in striatum of HD grade 2 (HD2) patients and controls.** (A) Quantification of relative protein amount in mitochondrial fraction isolated from striatal tissues. The total protein amount ( $\mu\text{g}$ ) in nonsynaptosomal samples was taken as 100% and used to recalculate relative protein amount in synaptosomal samples originating from the same tissue block (listed in



Table 1). (B) Immunoblot and (C) quantification of protein level of striatal neuronal marker GAD1 in whole brain (WB) lysates.

Table S1. Binding affinity constants of TIM23 complex subunits with HTT exon1 fragments.

| Ligand         | Sample | Curve  | Temp (°C) | Fit         | $k_a$    | $k_d$    | KD       |
|----------------|--------|--------|-----------|-------------|----------|----------|----------|
| GST-HTTex1-23Q | TIM23  | Fc=2-1 | 25        | 1:1 Binding | 1.22E+04 | 4.18E-05 | 3.43E-09 |
| GST-HTTex1-23Q | TIM50  | Fc=2-1 | 25        | 1:1 Binding | 3.87E+05 | 0.2054   | 5.31E-07 |
| GST-HTTex1-23Q | TIM17A | Fc=2-1 | 25        | 1:1 Binding | 2540     | 0.03182  | 1.25E-05 |
| GST-HTTex1-23Q | TIM17B | Fc=2-1 | 25        | 1:1 Binding | 5.38E+05 | 0.0539   | 1.00E-07 |
| GST-HTTex1-97Q | TIM23  | Fc=4-3 | 25        | 1:1 Binding | 1.58E+05 | 7.96E-08 | 5.05E-13 |
| GST-HTTex1-97Q | TIM50  | Fc=4-3 | 25        | 1:1 Binding | 1.43E+04 | 6.61E-04 | 4.62E-08 |
| GST-HTTex1-97Q | TIM17A | Fc=4-3 | 25        | 1:1 Binding | 2.75E+04 | 8.44E-05 | 3.07E-09 |
| GST-HTTex1-97Q | TIM17B | Fc=4-3 | 25        | 1:1 Binding | 4637     | 6.84E-04 | 1.48E-07 |

note:

$k_a$  – association constant

$k_d$  - dissociation constant

KD - equilibrium dissociation constant

Table S2. Human brain tissue information.

| Type     | Grade | Specimen | Age | Gender | CAG repeats | Standard brain block (SBB) <sup>1</sup> | Postmortem interval before frozen |
|----------|-------|----------|-----|--------|-------------|-----------------------------------------|-----------------------------------|
| Cortex   |       |          |     |        |             |                                         |                                   |
| Control  | n.a.  | T-145    | 57  | F      | N.E.        | SBB4.1                                  | 9:14                              |
| Control  | n.a.  | T-159    | 54  | F      | N.E.        | SBB2.1                                  | 15:40                             |
| Control  | n.a.  | T-169    | 67  | M      | N.E.        | SBB4.2                                  | 49:20                             |
| Control  | n.a.  | T-171    | 89  | M      | N.E.        | SBB1                                    | 6:05                              |
| Control  | n.a.  | T-172    | 89  | M      | N.E.        | SBB4.1                                  | 8:45                              |
| Control  | n.a.  | T-206    | 49  | M      | N.E.        | SBB2.2                                  | 15:05                             |
| Control  | n.a.  | T-551    | 77  | F      | N.E.        | SBB3.1                                  | 13:34                             |
| Control  | n.a.  | T-4931   | 66  | M      | N.E.        | SBB3.2                                  | 26:55                             |
| HD4      | 4     | T-4522   | 42  | M      | 52/17       | SBB1.3                                  | 10:58                             |
| HD4      | 4     | T-4584   | 41  | M      | 49/17       | SBB4.2                                  | 38:20                             |
| HD4      | 4     | T-4638   | 39  | F      | 52/18       | SBB3.1                                  | 28:46                             |
| HD4      | 4     | T-4929   | 50  | M      | 49/16       | SBB1.4                                  | 43:08                             |
| HD4      | 4     | T-5017   | 66  | F      | 44/17       | SBB3.3                                  | 5:30                              |
| HD4      | 4     | T-5301   | 64  | F      | 46/19       | SBB3.1                                  | 18:52                             |
| HD4      | 4     | T-5321   | 50  | M      | N.E.        | SBB3.1                                  | 31:38                             |
| Striatum |       |          |     |        |             |                                         |                                   |
| Control  | n.a.  | T-110    | 62  | M      | N.E.        | SBB7.1                                  | N.E.                              |
| Control  | n.a.  | T-133    | 33  | F      | N.E.        | SBB7.1                                  | 11:25                             |
| Control  | n.a.  | T-169    | 69  | M      | N.E.        | SBB6.2                                  | 49:20                             |
| Control  | n.a.  | T-180    | 52  | F      | N.E.        | SBB7.2                                  | 6:07                              |
| Control  | n.a.  | T-638    | 78  | M      | N.E.        | SBB7.1                                  | 8:00                              |
| Control  | n.a.  | T-3925   | 79  | F      | N.E.        | SBB6.1                                  | 18:50                             |
| Control  | n.a.  | T-5404   | 54  | F      | N.E.        | SBB7.1                                  | 16:36                             |
| HD2      | 2     | T-461    | 77  | M      | 41/15       | SBB7.2                                  | 19:28                             |
| HD2      | 2     | T-3221   | 58  | M      | 42/15       | SBB7.2                                  | 85:11                             |
| HD2      | 2     | T-4394   | 75  | F      | 41/17       | SBB7.2                                  | 22:50                             |
| HD2      | 2     | T-4498   | 59  | M      | 43/17       | SBB6.2                                  | 32:45                             |
| HD2      | 2     | T-4964   | 89  | M      | 40/17       | SBB6.0                                  | 10:35                             |
| HD2      | 2     | T-4989   | 75  | F      | 42/15       | SBB6.1                                  | 37:35                             |
| HD2      | 2     | T-5263   | 55  | F      | 54/30       | SBB6.2                                  | 30:50                             |

note:

Grade - diagnosed HD grade, Specimen - frozen tissue samples, Age - years at death, F - female, M - male, N.E. - not estimated, n.a. - not applicable, CAG repeats - number of CAG repeats of both alleles.

1 Vonsattel, J. P., Del Amaya, M. P. & Keller, C. E. Twenty-first century brain banking. Processing brains for research: the Columbia University methods. *Acta Neuropathol* **115**, 509-532, doi:10.1007/s00401-007-0311-9 (2008).

Table S3. DIGE map spot identifier.

| Spot # | Identified protein |           | Protein name                                                                   | Localization                 |
|--------|--------------------|-----------|--------------------------------------------------------------------------------|------------------------------|
|        | UniProt ID         | Gene      |                                                                                |                              |
| 1      | Q64521             | GPD2      | Glycerol-3-phosphate dehydrogenase, mitochondrial                              | Inner mitochondrial membrane |
|        | P48678             | LMNA      |                                                                                | NM                           |
| 2      | Q8BH04             | PCK2      | Phosphoenolpyruvate carboxykinase [GTP], mitochondrial                         | Mitochondrial matrix         |
|        | Q8K2B3             | SDHA      | Succinate dehydrogenase [ubiquinone] flavoprotein subunit, mitochondrial       | Inner mitochondrial membrane |
| 3      | Q8BH04             | PCK2      | See spot 2                                                                     |                              |
|        | Q8K2B3             | SDHA      | See spot 2                                                                     |                              |
| 4      | P80318             | CCT3      |                                                                                | NM                           |
| 5      | Q99KE1             | ME2       | NAD-dependent malic enzyme, mitochondrial                                      | Mitochondrial matrix         |
|        | O08749             | DLD (LAD) | Dihydrolipoyl dehydrogenase, mitochondrial                                     | Mitochondrial matrix         |
| 6      | Q61753             | PHGDH     |                                                                                | NM                           |
| 7      | P80314             | CCT2      |                                                                                | NM                           |
| 8      | P47738             | ALDH2     | Aldehyde dehydrogenase, mitochondrial                                          | Mitochondrial matrix         |
| 9      | P50544             | ACADVL    | Very long-chain specific acyl-CoA dehydrogenase, mitochondrial                 | Inner mitochondrial membrane |
| 10     | Q5SX75             | P4HA2     |                                                                                | NM                           |
|        | P63038             | HSP60     | 60 kDa heat shock protein, mitochondrial                                       | Mitochondrial matrix *       |
| 11     | Q5SX75             | P4HA2     |                                                                                | NM                           |
|        | P27773             | PDIA3     |                                                                                | NM                           |
|        | Q60715             | P4HA1     |                                                                                | NM                           |
| 12     | P27773             | PDIA3     |                                                                                | NM                           |
| 13     | P11983             | TCP1      |                                                                                | NM                           |
| 14     | Q99JY              | ACTR3     |                                                                                | NM                           |
|        | P56480             | ATP5B     | ATP synthase subunit beta, mitochondrial                                       | Inner mitochondrial membrane |
| 15     | P29758             | OAT       | Ornithine aminotransferase, mitochondrial                                      | Mitochondrial matrix         |
| 16     | P29758             | OAT       | See spot 15                                                                    |                              |
| 17     | P17182             | ENO1      |                                                                                | NM                           |
|        | Q9D8N0             | EEF1g     |                                                                                | NM                           |
| 18     | Q8BFR5             | TUFM      | Elongation factor Tu, mitochondrial                                            | Mitochondrial matrix         |
| 19     | Q8BMD8             | SLC25A24  | Calcium-binding mitochondrial carrier protein SCaMC-1                          | Inner mitochondrial membrane |
|        | P35486             | PDHA1     | Pyruvate dehydrogenase E1 component subunit alpha, somatic form, mitochondrial | Mitochondrial matrix         |

|    |        |          |                                                               |                              |
|----|--------|----------|---------------------------------------------------------------|------------------------------|
|    | Q9QYR9 | ACOT2    | Acyl-coenzyme A thioesterase 2, mitochondrial                 | Mitochondrial matrix         |
| 20 | Q9JHI5 | IVD      | Isovaleryl-CoA dehydrogenase, mitochondrial                   | Mitochondrial matrix         |
|    | Q8K248 | HPDL     |                                                               | NM                           |
|    | O88986 | GCAT     | 2-amino-3-ketobutyrate coenzyme A ligase, mitochondrial       | Mitochondrial matrix *       |
|    | Q8BMD8 | SLC25A24 | See spot 19                                                   |                              |
| 21 | P10107 | ANXA1    |                                                               | NM                           |
| 22 | O88544 | COPS4    |                                                               | NM                           |
| 23 | Q9D6R2 | IDH3A    | Isocitrate dehydrogenase [NAD] subunit alpha, mitochondrial   | Mitochondrial matrix         |
| 24 | P47754 | CAPZA2   |                                                               | NM                           |
| 28 | P67778 | PHB      | Prohibitin                                                    | Inner mitochondrial membrane |
| 29 | O88696 | CLPP     | ATP-dependent Clp protease proteolytic subunit, mitochondrial | Mitochondrial matrix         |
| 32 | P20108 | PRDX3    | Thioredoxin-dependent peroxide reductase, mitochondrial       | Mitochondrial matrix *       |

note:

NM – non mitochondrial, \* - multiple intracellular localization.

Spots 25, 26, 27, 30, 31 were not confirmed due to low level of protein.

Table S4. List of all identified mitochondrial proteins.

| Identified protein                                                                                                                         | UniProt ID  | MW     |
|--------------------------------------------------------------------------------------------------------------------------------------------|-------------|--------|
| A2AJP9_MOUSE MCG54027, isoform CRA_a OS=Mus musculus GN=Pdp1 PE=3 SV=2                                                                     | A2AJP9 (+3) | 64 kDa |
| A2AQR0_MOUSE Glycerol-3-phosphate dehydrogenase, mitochondrial OS=Mus musculus GN=Gpd2 PE=2 SV=1                                           | A2AQR0 (+1) | 83 kDa |
| XPP3_MOUSE Probable Xaa-Pro aminopeptidase 3 OS=Mus musculus GN=Xpnpep3 PE=2 SV=1                                                          | B7ZMP1      | 57 kDa |
| D3YXX5_MOUSE NADH dehydrogenase [ubiquinone] flavoprotein 1, mitochondrial (Fragment) OS=Mus musculus GN=Ndufv1 PE=2 SV=1                  | D3YXX5 (+2) | 13 kDa |
| D3Z0L4_MOUSE Coiled-coil-helix-coiled-coil-helix domain-containing protein 3, mitochondrial (Fragment) OS=Mus musculus GN=Chchd3 PE=2 SV=1 | D3Z0L4 (+3) | 22 kDa |
| GLSK_MOUSE Glutaminase kidney isoform, mitochondrial OS=Mus musculus GN=Gls PE=1 SV=1                                                      | D3Z7P3      | 74 kDa |
| GLSK_MOUSE Isoform 2 of Glutaminase kidney isoform, mitochondrial OS=Mus musculus GN=Gls                                                   | D3Z7P3-2    | 66 kDa |
| E9PUB7_MOUSE Protein misato homolog 1 OS=Mus musculus GN=Msto1 PE=2 SV=1                                                                   | E9PUB7 (+2) | 61 kDa |
| F2Z471_MOUSE Voltage-dependent anion-selective channel protein 1 OS=Mus musculus GN=Vdac1 PE=2 SV=1                                        | F2Z471 (+2) | 28 kDa |
| F8WIT2_MOUSE Annexin OS=Mus musculus GN=Anxa6 PE=2 SV=1                                                                                    | F8WIT2 (+1) | 75 kDa |
| G3UX26_MOUSE Voltage-dependent anion-selective channel protein 2 (Fragment) OS=Mus musculus GN=Vdac2 PE=4 SV=1                             | G3UX26      | 30 kDa |
| DLDH_MOUSE Dihydrolipoyl dehydrogenase, mitochondrial OS=Mus musculus GN=Dld PE=1 SV=2                                                     | O08749      | 54 kDa |
| PRDX4_MOUSE Peroxiredoxin-4 OS=Mus musculus GN=Prdx4 PE=1 SV=1                                                                             | O08807      | 31 kDa |
| PHB2_MOUSE Prohibitin-2 OS=Mus musculus GN=Phb2 PE=1 SV=1                                                                                  | O35129      | 33 kDa |
| TIM44_MOUSE Mitochondrial import inner membrane translocase subunit TIM44 OS=Mus musculus GN=Timm44 PE=2 SV=2                              | O35857      | 51 kDa |
| PTRF_MOUSE Polymerase I and transcript release factor OS=Mus musculus GN=Ptrf PE=1 SV=1                                                    | O54724      | 44 kDa |
| 1433S_MOUSE 14-3-3 protein sigma OS=Mus musculus GN=Sfn PE=1 SV=2                                                                          | O70456      | 28 kDa |
| CLPP_MOUSE Putative ATP-dependent Clp protease proteolytic subunit, mitochondrial OS=Mus musculus GN=Clpp PE=1 SV=1                        | O88696      | 30 kDa |
| KBL_MOUSE 2-amino-3-ketobutyrate coenzyme A ligase, mitochondrial OS=Mus musculus GN=Gcat PE=1 SV=2                                        | O88986      | 45 kDa |
| AATM_MOUSE Aspartate aminotransferase, mitochondrial OS=Mus musculus GN=Got2 PE=1 SV=1                                                     | P05202      | 47 kDa |
| ANXA1_MOUSE Annexin A1 OS=Mus musculus GN=Anxa1 PE=1 SV=2                                                                                  | P10107      | 39 kDa |
| PRDX3_MOUSE Thioredoxin-dependent peroxide reductase, mitochondrial OS=Mus musculus GN=Prdx3 PE=1 SV=1                                     | P20108      | 28 kDa |
| VIME_MOUSE Vimentin OS=Mus musculus GN=Vim PE=1 SV=3                                                                                       | P20152      | 54 kDa |
| CATA_MOUSE Catalase OS=Mus musculus GN=Cat PE=1 SV=4                                                                                       | P24270      | 60 kDa |
| DHE3_MOUSE Glutamate dehydrogenase 1, mitochondrial OS=Mus                                                                                 | P26443      | 61 kDa |

|                                                                                                                              |             |        |
|------------------------------------------------------------------------------------------------------------------------------|-------------|--------|
| musculus GN=Glud1 PE=1 SV=1                                                                                                  |             |        |
| OAT_MOUSE Ornithine aminotransferase, mitochondrial OS=Mus musculus GN=Oat PE=1 SV=1                                         | P29758      | 48 kDa |
| MP2K1_MOUSE Dual specificity mitogen-activated protein kinase kinase 1 OS=Mus musculus GN=Map2k1 PE=1 SV=2                   | P31938      | 43 kDa |
| NLTP_MOUSE Non-specific lipid-transfer protein OS=Mus musculus GN=Scp2 PE=1 SV=3                                             | P32020      | 59 kDa |
| ODPA_MOUSE Pyruvate dehydrogenase E1 component subunit alpha, somatic form, mitochondrial OS=Mus musculus GN=Pdha1 PE=1 SV=1 | P35486      | 43 kDa |
| GRP75_MOUSE Stress-70 protein, mitochondrial OS=Mus musculus GN=Hspa9 PE=1 SV=3                                              | P38647      | 73 kDa |
| ACADM_MOUSE Medium-chain specific acyl-CoA dehydrogenase, mitochondrial OS=Mus musculus GN=Acadm PE=1 SV=1                   | P45952      | 46 kDa |
| ALDH2_MOUSE Aldehyde dehydrogenase, mitochondrial OS=Mus musculus GN=Aldh2 PE=1 SV=1                                         | P47738      | 57 kDa |
| GSHR_MOUSE Glutathione reductase, mitochondrial OS=Mus musculus GN=Gsr PE=1 SV=3                                             | P47791 (+1) | 54 kDa |
| LMNA_MOUSE Prelamin-A/C OS=Mus musculus GN=Lmna PE=1 SV=2                                                                    | P48678      | 74 kDa |
| LMNA_MOUSE Prelamin-A/C OS=Mus musculus GN=Lmna PE=1 SV=2                                                                    | P48678 (+1) | 74 kDa |
| LMNA_MOUSE Isoform C of Prelamin-A/C OS=Mus musculus GN=Lmna                                                                 | P48678-2    | 65 kDa |
| ODBA_MOUSE 2-oxoisovalerate dehydrogenase subunit alpha, mitochondrial OS=Mus musculus GN=Bckdha PE=1 SV=1                   | P50136 (+1) | 50 kDa |
| VATA_MOUSE V-type proton ATPase catalytic subunit A OS=Mus musculus GN=Atp6v1a PE=1 SV=2                                     | P50516      | 68 kDa |
| ACADV_MOUSE Very long-chain specific acyl-CoA dehydrogenase, mitochondrial OS=Mus musculus GN=Acadvl PE=1 SV=3               | P50544      | 71 kDa |
| ACADL_MOUSE Long-chain specific acyl-CoA dehydrogenase, mitochondrial OS=Mus musculus GN=Acadl PE=1 SV=2                     | P51174      | 48 kDa |
| KPYM_MOUSE Pyruvate kinase PKM OS=Mus musculus GN=Pkm PE=1 SV=4                                                              | P52480      | 58 kDa |
| IDHP_MOUSE Isocitrate dehydrogenase [NADP], mitochondrial OS=Mus musculus GN=ldh2 PE=1 SV=3                                  | P54071      | 51 kDa |
| ATPB_MOUSE ATP synthase subunit beta, mitochondrial OS=Mus musculus GN=Atp5b PE=1 SV=2                                       | P56480      | 56 kDa |
| RUVB1_MOUSE RuvB-like 1 OS=Mus musculus GN=Ruvb1 PE=1 SV=1                                                                   | P60122      | 50 kDa |
| 1433G_MOUSE 14-3-3 protein gamma OS=Mus musculus GN=Ywhag PE=1 SV=2                                                          | P61982      | 28 kDa |
| CH60_MOUSE 60 kDa heat shock protein, mitochondrial OS=Mus musculus GN=Hspd1 PE=1 SV=1                                       | P63038      | 61 kDa |
| PP1G_MOUSE Serine/threonine-protein phosphatase PP1-gamma catalytic subunit OS=Mus musculus GN=Ppp1cc PE=1 SV=1              | P63087 (+1) | 37 kDa |
| PHB_MOUSE Prohibitin OS=Mus musculus GN=Phb PE=1 SV=1                                                                        | P67778      | 30 kDa |
| TCPH_MOUSE T-complex protein 1 subunit eta OS=Mus musculus GN=Cct7 PE=1 SV=1                                                 | P80313      | 60 kDa |

|                                                                                                                                                       |             |         |
|-------------------------------------------------------------------------------------------------------------------------------------------------------|-------------|---------|
| FUMH_MOUSE Fumarate hydratase, mitochondrial OS=Mus musculus GN=Fh PE=1 SV=3                                                                          | P97807 (+1) | 54 kDa  |
| ATPA_MOUSE ATP synthase subunit alpha, mitochondrial OS=Mus musculus GN=Atp5a1 PE=1 SV=1                                                              | Q03265      | 60 kDa  |
| ACADS_MOUSE Short-chain specific acyl-CoA dehydrogenase, mitochondrial OS=Mus musculus GN=Acads PE=1 SV=2                                             | Q07417      | 45 kDa  |
| P4K2A_MOUSE Phosphatidylinositol 4-kinase type 2-alpha OS=Mus musculus GN=Pi4k2a PE=1 SV=1                                                            | Q2TBE6      | 54 kDa  |
| HSDL2_MOUSE Hydroxysteroid dehydrogenase-like protein 2 OS=Mus musculus GN=Hsd12 PE=1 SV=1                                                            | Q2TPA8      | 54 kDa  |
| FXRD1_MOUSE FAD-dependent oxidoreductase domain-containing protein 1 OS=Mus musculus GN=Foxred1 PE=2 SV=1                                             | Q3TQB2 (+1) | 54 kDa  |
| Q3U3J1_MOUSE 2-oxoisovalerate dehydrogenase subunit alpha, mitochondrial OS=Mus musculus GN=Bckdha PE=2 SV=1                                          | Q3U3J1      | 51 kDa  |
| C1TM_MOUSE Monofunctional C1-tetrahydrofolate synthase, mitochondrial OS=Mus musculus GN=Mthfd1l PE=1 SV=2                                            | Q3V3R1      | 106 kDa |
| P4HA1_MOUSE Prolyl 4-hydroxylase subunit alpha-1 OS=Mus musculus GN=P4ha1 PE=2 SV=2                                                                   | Q60715      | 61 kDa  |
| VDAC2_MOUSE Voltage-dependent anion-selective channel protein 2 OS=Mus musculus GN=Vdac2 PE=1 SV=2                                                    | Q60930      | 32 kDa  |
| MP2K2_MOUSE Dual specificity mitogen-activated protein kinase kinase 2 OS=Mus musculus GN=Map2k2 PE=1 SV=2                                            | Q63932 (+1) | 44 kDa  |
| GPDM_MOUSE Glycerol-3-phosphate dehydrogenase, mitochondrial OS=Mus musculus GN=Gpd2 PE=1 SV=2                                                        | Q64521      | 81 kDa  |
| Q6P8N8_MOUSE ATP-dependent Clp protease ATP-binding subunit clpX-like, mitochondrial OS=Mus musculus GN=Clpx PE=2 SV=1                                | Q6P8N8 (+1) | 67 kDa  |
| LPPRC_MOUSE Leucine-rich PPR motif-containing protein, mitochondrial OS=Mus musculus GN=Lrpprc PE=1 SV=2                                              | Q6PB66      | 157 kDa |
| Q6PF96_MOUSE Electron transfer flavoprotein-ubiquinone oxidoreductase, mitochondrial OS=Mus musculus GN=Etfdh PE=2 SV=1                               | Q6PF96 (+1) | 61 kDa  |
| EFTU_MOUSE Elongation factor Tu, mitochondrial OS=Mus musculus GN=Tufm PE=1 SV=1                                                                      | Q8BFR5      | 50 kDa  |
| SAM50_MOUSE Sorting and assembly machinery component 50 homolog OS=Mus musculus GN=Samm50 PE=1 SV=1                                                   | Q8BGH2      | 52 kDa  |
| ALAT2_MOUSE Alanine aminotransferase 2 OS=Mus musculus GN=Gpt2 PE=1 SV=1                                                                              | Q8BGT5      | 58 kDa  |
| PCKGM_MOUSE Phosphoenolpyruvate carboxykinase [GTP], mitochondrial OS=Mus musculus GN=Pck2 PE=2 SV=1                                                  | Q8BH04      | 71 kDa  |
| ODPX_MOUSE Pyruvate dehydrogenase protein X component, mitochondrial OS=Mus musculus GN=Pdhx PE=2 SV=1                                                | Q8BKZ9      | 54 kDa  |
| SCMC1_MOUSE Calcium-binding mitochondrial carrier protein SCaMC-1 OS=Mus musculus GN=Slc25a24 PE=2 SV=1                                               | Q8BMD8      | 53 kDa  |
| ODP2_MOUSE Dihydrolipoyllysine-residue acetyltransferase component of pyruvate dehydrogenase complex, mitochondrial OS=Mus musculus GN=Dlat PE=1 SV=2 | Q8BMF4      | 68 kDa  |
| CPSM_MOUSE Carbamoyl-phosphate synthase [ammonia], mitochondrial OS=Mus musculus GN=Cps1 PE=1 SV=2                                                    | Q8C196      | 165 kDa |
| NAKD2_MOUSE NAD kinase 2, mitochondrial OS=Mus musculus                                                                                               | Q8C5H8      | 51 kDa  |



|                                                                                                                               |               |         |
|-------------------------------------------------------------------------------------------------------------------------------|---------------|---------|
| GN=Nadk2 PE=1 SV=2                                                                                                            |               |         |
| NAKD2_MOUSE Isoform 2 of NAD kinase 2, mitochondrial OS=Mus musculus GN=Nadk2                                                 | Q8C5H8-2 (+1) | 43 kDa  |
| IMMT_MOUSE Isoform 2 of Mitochondrial inner membrane protein OS=Mus musculus GN=Immt                                          | Q8CAQ8-2      | 83 kDa  |
| LONM_MOUSE Lon protease homolog, mitochondrial OS=Mus musculus GN=Lonp1 PE=1 SV=2                                             | Q8CGK3        | 106 kDa |
| DHSA_MOUSE Succinate dehydrogenase [ubiquinone] flavoprotein subunit, mitochondrial OS=Mus musculus GN=Sdha PE=1 SV=1         | Q8K2B3        | 73 kDa  |
| PREP_MOUSE Presequence protease, mitochondrial OS=Mus musculus GN=Ptrm1 PE=1 SV=1                                             | Q8K411 (+1)   | 117 kDa |
| THIL_MOUSE Acetyl-CoA acetyltransferase, mitochondrial OS=Mus musculus GN=Acat1 PE=1 SV=1                                     | Q8QZT1        | 45 kDa  |
| SUOX_MOUSE Sulfite oxidase, mitochondrial OS=Mus musculus GN=Suox PE=2 SV=2                                                   | Q8R086        | 61 kDa  |
| COQ6_MOUSE Ubiquinone biosynthesis monooxygenase COQ6 OS=Mus musculus GN=Coq6 PE=2 SV=3                                       | Q8R1S0        | 51 kDa  |
| AT2A1_MOUSE Sarcoplasmic/endoplasmic reticulum calcium ATPase 1 OS=Mus musculus GN=Atp2a1 PE=2 SV=1                           | Q8R429        | 109 kDa |
| ACSF2_MOUSE Acyl-CoA synthetase family member 2, mitochondrial OS=Mus musculus GN=Acsf2 PE=1 SV=1                             | Q8VCW8        | 68 kDa  |
| NDUS2_MOUSE NADH dehydrogenase [ubiquinone] iron-sulfur protein 2, mitochondrial OS=Mus musculus GN=Ndufs2 PE=1 SV=1          | Q91WD5        | 53 kDa  |
| ETFD_MOUSE Electron transfer flavoprotein-ubiquinone oxidoreductase, mitochondrial OS=Mus musculus GN=Etfdh PE=1 SV=1         | Q921G7        | 68 kDa  |
| SELR1_MOUSE Sel1 repeat-containing protein 1 OS=Mus musculus GN=Selrc1 PE=2 SV=1                                              | Q921H9        | 26 kDa  |
| STML2_MOUSE Stomatin-like protein 2, mitochondrial OS=Mus musculus GN=Stoml2 PE=1 SV=1                                        | Q99JB2        | 38 kDa  |
| MAOM_MOUSE NAD-dependent malic enzyme, mitochondrial OS=Mus musculus GN=Me2 PE=2 SV=1                                         | Q99KE1        | 66 kDa  |
| ACON_MOUSE Aconitate hydratase, mitochondrial OS=Mus musculus GN=Aco2 PE=1 SV=1                                               | Q99K10        | 85 kDa  |
| NDUAA_MOUSE NADH dehydrogenase [ubiquinone] 1 alpha subcomplex subunit 10, mitochondrial OS=Mus musculus GN=Ndufa10 PE=1 SV=1 | Q99LC3        | 41 kDa  |
| GRPE1_MOUSE GrpE protein homolog 1, mitochondrial OS=Mus musculus GN=Grpel1 PE=1 SV=1                                         | Q99LP6        | 24 kDa  |
| TRAP1_MOUSE Heat shock protein 75 kDa, mitochondrial OS=Mus musculus GN=Trap1 PE=1 SV=1                                       | Q9CQN1        | 80 kDa  |
| PUR9_MOUSE Bifunctional purine biosynthesis protein PURH OS=Mus musculus GN=Atic PE=1 SV=2                                    | Q9CWJ9        | 64 kDa  |
| COQ5_MOUSE 2-methoxy-6-polyprenyl-1,4-benzoquinol methylase, mitochondrial OS=Mus musculus GN=Coq5 PE=2 SV=2                  | Q9CXI0        | 37 kDa  |
| MPPB_MOUSE Mitochondrial-processing peptidase subunit beta OS=Mus musculus GN=Pmpcb PE=2 SV=1                                 | Q9CXT8        | 55 kDa  |
| QCR1_MOUSE Cytochrome b-c1 complex subunit 1, mitochondrial                                                                   | Q9CZ13        | 53 kDa  |

|                                                                                                                                                               |             |        |
|---------------------------------------------------------------------------------------------------------------------------------------------------------------|-------------|--------|
| OS=Mus musculus GN=Uqcrc1 PE=1 SV=2                                                                                                                           |             |        |
| Q9CZN7_MOUSE Serine hydroxymethyltransferase OS=Mus musculus GN=Shmt2 PE=2 SV=1                                                                               | Q9CZN7      | 56 kDa |
| GATA_MOUSE Glutamyl-tRNA(Gln) amidotransferase subunit A, mitochondrial OS=Mus musculus GN=Qrs11 PE=2 SV=1                                                    | Q9CZN8      | 57 kDa |
| EFTS_MOUSE Elongation factor Ts, mitochondrial OS=Mus musculus GN=Tsfm PE=2 SV=1                                                                              | Q9CZR8      | 35 kDa |
| CISY_MOUSE Citrate synthase, mitochondrial OS=Mus musculus GN=Cs PE=1 SV=1                                                                                    | Q9CZU6      | 52 kDa |
| TOM70_MOUSE Mitochondrial import receptor subunit TOM70 OS=Mus musculus GN=Tom70a PE=1 SV=2                                                                   | Q9CZW5      | 68 kDa |
| ODPB_MOUSE Pyruvate dehydrogenase E1 component subunit beta, mitochondrial OS=Mus musculus GN=Pdhb PE=1 SV=1                                                  | Q9D051      | 39 kDa |
| TRM5_MOUSE tRNA (guanine(37)-N1)-methyltransferase OS=Mus musculus GN=Trmt5 PE=2 SV=1                                                                         | Q9D0C4 (+1) | 57 kDa |
| SCOT1_MOUSE Succinyl-CoA:3-ketoacid coenzyme A transferase 1, mitochondrial OS=Mus musculus GN=Oxct1 PE=1 SV=1                                                | Q9D0K2      | 56 kDa |
| ODO2_MOUSE Dihydrolipoyllysine-residue succinyltransferase component of 2-oxoglutarate dehydrogenase complex, mitochondrial OS=Mus musculus GN=Dlst PE=1 SV=1 | Q9D2G2      | 49 kDa |
| IDH3A_MOUSE Isocitrate dehydrogenase [NAD] subunit alpha, mitochondrial OS=Mus musculus GN=Idh3a PE=1 SV=1                                                    | Q9D6R2      | 40 kDa |
| TIM50_MOUSE Mitochondrial import inner membrane translocase subunit TIM50 OS=Mus musculus GN=Timm50 PE=1 SV=1                                                 | Q9D880      | 40 kDa |
| QCR2_MOUSE Cytochrome b-c1 complex subunit 2, mitochondrial OS=Mus musculus GN=Uqcrc2 PE=1 SV=1                                                               | Q9DB77      | 48 kDa |
| AL7A1_MOUSE Alpha-aminoacidic semialdehyde dehydrogenase OS=Mus musculus GN=Aldh7a1 PE=1 SV=4                                                                 | Q9DBF1 (+1) | 59 kDa |
| MPPA_MOUSE Mitochondrial-processing peptidase subunit alpha OS=Mus musculus GN=Pmpca PE=1 SV=1                                                                | Q9DC61      | 58 kDa |
| NDUS3_MOUSE NADH dehydrogenase [ubiquinone] iron-sulfur protein 3, mitochondrial OS=Mus musculus GN=Ndufs3 PE=1 SV=2                                          | Q9DCT2      | 30 kDa |
| ETFB_MOUSE Electron transfer flavoprotein subunit beta OS=Mus musculus GN=Etfb PE=1 SV=3                                                                      | Q9DCW4      | 28 kDa |
| MMSA_MOUSE Methylmalonate-semialdehyde dehydrogenase [acylating], mitochondrial OS=Mus musculus GN=Aldh6a1 PE=1 SV=1                                          | Q9EQ20      | 58 kDa |
| RM46_MOUSE 39S ribosomal protein L46, mitochondrial OS=Mus musculus GN=Mrpl46 PE=2 SV=1                                                                       | Q9EQI8      | 32 kDa |
| GSDMA_MOUSE Gasdermin-A OS=Mus musculus GN=Gsdma PE=2 SV=1                                                                                                    | Q9EST1      | 50 kDa |
| IVD_MOUSE Isovaleryl-CoA dehydrogenase, mitochondrial OS=Mus musculus GN=Ivd PE=1 SV=1                                                                        | Q9JHI5      | 46 kDa |
| SYSM_MOUSE Serine--tRNA ligase, mitochondrial OS=Mus musculus GN=Sars2 PE=1 SV=2                                                                              | Q9JL8       | 58 kDa |
| AL9A1_MOUSE 4-trimethylaminobutyraldehyde dehydrogenase OS=Mus musculus GN=Aldh9a1 PE=1 SV=1                                                                  | Q9JLJ2      | 54 kDa |
| ACOT2_MOUSE Acyl-coenzyme A thioesterase 2, mitochondrial OS=Mus musculus GN=Acot2 PE=1 SV=2                                                                  | Q9QYR9      | 50 kDa |

|                                                                                                               |             |        |
|---------------------------------------------------------------------------------------------------------------|-------------|--------|
| CAH5B_MOUSE Carbonic anhydrase 5B, mitochondrial OS=Mus musculus GN=Ca5b PE=2 SV=2                            | Q9QZA0      | 37 kDa |
| AIFM1_MOUSE Apoptosis-inducing factor 1, mitochondrial OS=Mus musculus GN=Aifm1 PE=1 SV=1                     | Q9Z0X1      | 67 kDa |
| NFS1_MOUSE Cysteine desulfurase, mitochondrial OS=Mus musculus GN=Nfs1 PE=2 SV=3                              | Q9Z1J3      | 51 kDa |
| SUCB2_MOUSE Succinyl-CoA ligase [GDP-forming] subunit beta, mitochondrial OS=Mus musculus GN=Suclg2 PE=1 SV=3 | Q9Z2I8      | 47 kDa |
| SUCB2_MOUSE Succinyl-CoA ligase [GDP-forming] subunit beta, mitochondrial OS=Mus musculus GN=Suclg2 PE=1 SV=3 | Q9Z2I8 (+1) | 47 kDa |
| SUCB1_MOUSE Succinyl-CoA ligase [ADP-forming] subunit beta, mitochondrial OS=Mus musculus GN=Sucla2 PE=1 SV=2 | Q9Z2I9      | 50 kDa |

Table S5. Source Extractor protein counts of the Q7 and Q111 proteome changes in Figure 2.

| Guide star spots |          |                            |         |                      |  |
|------------------|----------|----------------------------|---------|----------------------|--|
|                  | Cy3-Flux | Cy5-Flux                   | Cy3/Cy5 | C3/Cy5<br>Normalized |  |
| *1               | 4663.9   | 11935.8                    | 0.39    | 0.977                |  |
| *2               | 1491.9   | 3621.6                     | 0.41    | 1.030                |  |
| *3               | 13976.7  | 36562.2                    | 0.38    | 0.956                |  |
| *4               | 240047.0 | 518705.1                   | 0.46    | 1.157                |  |
| *5               | 168505.5 | 438975.3                   | 0.38    | 0.960                |  |
| *6               | 36092.9  | 92785.3                    | 0.39    | 0.972                |  |
| *7               | 27635.7  | 67814.5                    | 0.41    | 1.019                |  |
| *8               | 41361.2  | 110093.2                   | 0.38    | 0.939                |  |
| *9               | 8832.0   | 21893.6                    | 0.40    | 1.009                |  |
|                  |          | Average                    | 0.40    | 1.002                |  |
|                  |          | %<br>Standard<br>deviation | 2.63%   | 6.57%                |  |

| Difference protein spots |          |          |         |                      |                |
|--------------------------|----------|----------|---------|----------------------|----------------|
|                          | Cy3-Flux | Cy5-Flux | Cy3/Cy5 | C3/Cy5<br>Normalized | Fold<br>change |
| 1†                       | 27529.5  | 34460.7  | 0.80    | 1.997                | 2.00           |
| 2                        | 1906.4   | 72904.4  | 0.03    | 0.065                | -15.30         |
| 3                        | 41395.1  | 38849.4  | 1.07    | 2.664                | 2.66           |
| 4                        | 100417.3 | 156390.9 | 0.64    | 1.605                | 1.61           |
| 5                        | 59180.5  | 211718.0 | 0.28    | 0.699                | -1.43          |
| 6                        | 110601.5 | 50169.4  | 2.20    | 5.511                | 5.51           |
| 7                        | 139736.9 | 118210.5 | 1.18    | 2.955                | 2.96           |
| 8                        | 64777.6  | 345285.2 | 0.19    | 0.469                | -2.13          |
| 9                        | 15608.6  | 2283.7   | 6.83    | 17.087               | 17.09          |

note:

† This spot was not detected by Source Extractor. These values were obtained manually using ImageJ.

Table S6. Mitochondrial proteins grouped by import pathway based on primary structure as indicated in UniProt database or stated in references.

| Pathway                       | Gene     | Protein structure and mitochondrial localization                                                                                                                                |
|-------------------------------|----------|---------------------------------------------------------------------------------------------------------------------------------------------------------------------------------|
| Mim1, TOM40+SAM50             | TOM70A   | Outer membrane single-pass protein. Contains: no MTS, 1 helical transmembrane stretch, and domains protruding into mitochondrial intermembrane space and cytoplasmic side.      |
|                               | SAM50    | Outer membrane multi-pass protein. Contains: no MTS, C-terminal 16 transmembrane $\beta$ -barrel structures.                                                                    |
|                               | TOM40    | Outer membrane multi-pass protein. Contains: no MTS, 19 membrane-spanning $\beta$ -barrel strands.                                                                              |
|                               | TOM22    | Outer membrane single-pass protein. Contains: no MTS, 1 helical transmembrane stretch, and domains protruding into mitochondrial intermembrane space and cytoplasmic side.      |
|                               | VDAC2    | Outer membrane multi-pass protein. Contains: no MTS, 19 membrane-spanning $\beta$ -barrel strands.                                                                              |
|                               | VDAC1    | Outer membrane multi-pass protein. Contains: no MTS, 19 membrane-spanning $\beta$ -barrel strands.                                                                              |
| TOM40+TIM22                   | SLC25A24 | Inner membrane multi-pass protein. Contains: no MTS, 6 transmembrane helical strands.                                                                                           |
|                               | SLC25A23 | Inner membrane multi-pass protein. Contains: no MTS, 6 transmembrane helical strands.                                                                                           |
|                               | SLC25A12 | Inner membrane multi-pass protein. Contains: no MTS, 6 transmembrane helical strands.                                                                                           |
|                               | TIM22    | Inner membrane multi-pass protein. Contains: no MTS, 3 transmembrane helical strands.                                                                                           |
|                               | TIM23    | Inner membrane multi-pass protein. Contains: no MTS, 3 transmembrane helical strands.                                                                                           |
| TOM40+TIM23<br>Membrane bound | TIM44    | Peripheral inner membrane protein associated with the matrix side of the membrane <sup>1,2</sup> .                                                                              |
|                               | TIM50    | Single-pass inner membrane protein. Contains: MTS, 1 helical transmembrane stretch, and domains protruding into mitochondrial intermembrane space and matrix.                   |
|                               | GPD2     | Integral protein of inner membrane. Contains: MTS, 3 transmembrane stretches, big intermembrane space domain and N-terminus facing matrix <sup>3</sup> .                        |
|                               | ACADVL   | Inner membrane anchored protein. Contains: MTS and C-terminal membrane-anchored region.                                                                                         |
|                               | PHB      | Inner membrane anchored protein. Contains: N-terminal unconventional targeting sequence, and hydrophobic stretches. Uses TIM23 for insertion into inner membrane <sup>4</sup> . |
| TOM40+TIM23 Matrix soluble    | OTC      | Matrix protein. Contains MTS.                                                                                                                                                   |
|                               | TUFM     | Matrix protein. Contains MTS.                                                                                                                                                   |
|                               | IDH3A    | Matrix protein. Contains MTS.                                                                                                                                                   |
|                               | CLPP     | Matrix protein. Contains MTS.                                                                                                                                                   |
|                               | OAT      | Matrix protein. Contains MTS.                                                                                                                                                   |
|                               | ME2      | Matrix protein. Contains MTS.                                                                                                                                                   |

note:

MTS – N-terminal mitochondrial targeting sequence.

- 1 Berthold, J. *et al.* The MIM complex mediates preprotein translocation across the mitochondrial inner membrane and couples it to the mt-Hsp70/ATP driving system. *Cell* **81**, 1085-1093, doi:S0092-8674(05)80013-3 [pii] (1995).
- 2 Rassow, J. *et al.* Mitochondrial protein import: biochemical and genetic evidence for interaction of matrix hsp70 and the inner membrane protein MIM44. *J Cell Biol* **127**, 1547-1556 (1994).
- 3 MacDonald, M. J. & Brown, L. J. Calcium activation of mitochondrial glycerol phosphate dehydrogenase restudied. *Arch Biochem Biophys* **326**, 79-84, doi:S0003-9861(96)90049-1 [pii] 10.1006/abbi.1996.0049 (1996).
- 4 Tatsuta, T., Model, K. & Langer, T. Formation of membrane-bound ring complexes by prohibitins in mitochondria. *Mol Biol Cell* **16**, 248-259, doi:E04-09-0807 [pii] 10.1091/mbc.E04-09-0807 (2005).

Table S7. Comparison of mitochondrial protein levels between Q7 and Q111 mitochondria.

|                    | Pathway                     | Protein  | Q111 mitochondria |                        | Average per group, % | MANOVA                                          |                            |
|--------------------|-----------------------------|----------|-------------------|------------------------|----------------------|-------------------------------------------------|----------------------------|
|                    |                             |          | % of control      | <i>P</i> value, t-test |                      | Dependent variables, proteins                   | Q111 vs Q7, <i>P</i> value |
| Non-TIM23 imported | Mim1, TOM40+ SAM50          | VDAC1    | 51.0              | 0.0024                 | 58                   | VDAC1<br>TOM40<br>TIM22<br>SLC25A23<br>SLC25A24 | 0.025                      |
|                    |                             | VDAC2    | 38.0              | 0.0146                 |                      |                                                 |                            |
|                    |                             | SAM50    | 63.6              | 0.0040                 |                      |                                                 |                            |
|                    |                             | TOM70A   | 61.5              | 0.0435                 |                      |                                                 |                            |
|                    |                             | TOM40    | 52.6              | 0.0627                 |                      |                                                 |                            |
|                    |                             | TOM22    | 40.7              | 0.1116                 |                      |                                                 |                            |
|                    | TOM40+ TIM22                | SLC25A24 | 67.2              | 0.1028                 |                      |                                                 |                            |
|                    |                             | SLC25A23 | 101.9             | 0.9668                 |                      |                                                 |                            |
|                    |                             | SLC25A12 | 74.4              | 0.4100                 |                      |                                                 |                            |
|                    |                             | TIM22    | 33.3              | 0.0491                 |                      |                                                 |                            |
|                    | TIM23                       | 55.5     | 0.0788            |                        |                      |                                                 |                            |
| TIM23 imported     | TOM40+ TIM23 Membrane bound | PHB      | 72.5              | 0.0023                 | 49                   | CLPP<br>ACADVL<br>OTC<br>ME2                    | 0.008                      |
|                    |                             | TIM50    | 57.2              | 0.0131                 |                      |                                                 |                            |
|                    |                             | TIM44    | 37.9              | 0.0080                 |                      |                                                 |                            |
|                    |                             | GPD2     | 49.1              | 0.0004                 |                      |                                                 |                            |
|                    |                             | ACADVL   | 81.3              | 0.5157                 |                      |                                                 |                            |
|                    | TOM40+ TIM23 Matrix soluble | OTC      | 22.0              | 0.0165                 |                      |                                                 |                            |
|                    |                             | TUFM     | 38.4              | 0.0004                 |                      |                                                 |                            |
|                    |                             | IDH3A    | 46.1              | 0.0001                 |                      |                                                 |                            |
|                    |                             | CLPP     | 32.8              | 0.00001                |                      |                                                 |                            |
|                    |                             | OAT      | 49.3              | 0.0021                 |                      |                                                 |                            |
|                    |                             | ME2      | 53.8              | 0.1107                 |                      |                                                 |                            |

note:

MANOVA *P*-value was for Q7 vs. Q111 and when considering the listed proteins together. One of the assumptions of MANOVA analysis is that there should be no collinearity among the dependent variables; thus, highly correlated dependent variables (correlation coefficient > 0.8) were removed from the comparison. Average per group – average value for group of TIM23-imported and non-TIM23 imported proteins.

Table S8. Comparison of mitochondrial protein levels between Control and HD grade 2 striatum.

|                    | Pathway                     | Protein  | HD2 Striatum NS |                 | AVRG per group, % | MANOVA                        |                            | HD2 Striatum SM |                 | AVRG per group, % | MANOVA                        |                            |
|--------------------|-----------------------------|----------|-----------------|-----------------|-------------------|-------------------------------|----------------------------|-----------------|-----------------|-------------------|-------------------------------|----------------------------|
|                    |                             |          | % of control    | P value, t-test |                   | Dependent variables, proteins | NS HD2 vs Control, P value | % of control    | P value, t-test |                   | Dependent variables, proteins | SM HD2 vs Control, P value |
| Non-TIM23 imported | Mim1, TOM40+ SAM50          | VDAC1    | 95.9            | 0.6328          | 92                | VDAC2                         | 0.019                      | 104.3           | 0.7960          | 97                | VDAC2                         | 0.005                      |
|                    |                             | VDAC2    | 80.7            | 0.1295          |                   | SAM50                         |                            | 120.2           | 0.4474          |                   | SAM50                         |                            |
|                    |                             | SAM50    | 118.6           | 0.1317          |                   | TOM70A                        |                            | 122.5           | 0.0198          |                   | TOM70A                        |                            |
|                    |                             | TOM70A   | 47.3            | 0.0180          |                   | TOM40                         |                            | 55.7            | 0.0353          |                   | TOM40                         |                            |
|                    |                             | TOM40    | 117.8           | 0.1102          |                   | SLC25A23                      |                            | 100.6           | 0.9591          |                   | SLC25A23                      |                            |
|                    |                             | TOM22    | 82.4            | 0.3616          |                   | SLC25A12                      |                            | 76.5            | 0.1052          |                   | SLC25A24                      |                            |
|                    |                             |          |                 |                 |                   |                               |                            |                 |                 |                   | SLC25A12                      |                            |
|                    | TOM40+ TIM22                | SLC25A24 | 123.1           | 0.1616          |                   | TIM22                         |                            | 121.4           | 0.0997          |                   | TIM23                         |                            |
|                    |                             | SLC25A23 | 87.9            | 0.1171          |                   | TIM23                         |                            | 86.3            | 0.0014          |                   |                               |                            |
|                    |                             | SLC25A12 | 95.6            | 0.5754          |                   |                               |                            | 103.4           | 0.7437          |                   |                               |                            |
| TIM23              |                             | 73.9     | 0.5945          |                 | 75.8              | 0.5774                        |                            |                 |                 |                   |                               |                            |
|                    | TIM22                       | 94.2     | 0.0218          |                 | 95.0              | 0.0196                        |                            |                 |                 |                   |                               |                            |
| TIM23 imported     | TOM40+ TIM23 Membrane bound | PHB      | 86.5            | 0.0632          | 82                | PHB                           | 0.003                      | 106.1           | 0.2888          | 93                | PHB                           | 0.035                      |
|                    |                             | TIM50    | 55.8            | 0.0474          |                   | TIM44                         |                            | 61.1            | 0.0110          |                   | TIM50                         |                            |
|                    |                             | TIM44    | 62.6            | 0.0278          |                   | GPD2                          |                            | 77.5            | 0.1529          |                   | TIM44                         |                            |
|                    |                             | GPD2     | 97.6            | 0.7661          |                   | ACADVL                        |                            | 83.4            | 0.0177          |                   | GPD2                          |                            |
|                    |                             | ACADVL   | 137.8           | 0.1339          |                   | CLPP                          |                            | 155.5           | 0.0540          |                   | OTC                           |                            |
|                    | TOM40+ TIM23 Matrix soluble | OTC      | 66.1            | 0.0080          |                   | OAT                           |                            | 81.6            | 0.1736          |                   |                               |                            |
|                    |                             | TUFM     | 70.5            | 0.0082          |                   | ME2                           |                            | 80.1            | 0.2142          |                   |                               |                            |
|                    |                             | IDH3A    | 62.5            | 0.0235          |                   |                               |                            | 91.8            | 0.6529          |                   |                               |                            |
|                    |                             | CLPP     | 56.8            | 0.1188          |                   |                               |                            | 97.7            | 0.9063          |                   |                               |                            |
|                    |                             | OAT      | 80.2            | 0.5163          |                   |                               |                            | 76.2            | 0.3597          |                   |                               |                            |
|                    | ME2                         | 122.4    | 0.3387          |                 | 107.0             | 0.7542                        |                            |                 |                 |                   |                               |                            |

note:

MANOVA P-value was for control vs. HD when considering the listed proteins together. NS – nonsynaptosomal mitochondria, SM – synaptosomal mitochondria additionally purified with MACS kit. One of the assumptions of MANOVA analysis is that there should be no collinearity among the dependent variables; thus, highly correlated dependent variables (correlation coefficient > 0.8) were removed from the comparison. Average (AVRG) per group – average value for group of TIM23-imported and non-TIM23 imported proteins.



Table S9. Comparison of mitochondrial protein levels between Control and HD grade 4 cortex.

|                    | Pathway                     | Protein                                             | HD4 Cortex NS                                  |                                                          | AVRG per group, % | MANOVA                                                 |                            | HD4 Cortex SM                                 |                                                          | AVRG per group, % | MANOVA                                                    |                            |
|--------------------|-----------------------------|-----------------------------------------------------|------------------------------------------------|----------------------------------------------------------|-------------------|--------------------------------------------------------|----------------------------|-----------------------------------------------|----------------------------------------------------------|-------------------|-----------------------------------------------------------|----------------------------|
|                    |                             |                                                     | % of control                                   | P value, t-test                                          |                   | Dependent variables, proteins                          | NS HD4 vs Control, P value | % of control                                  | P value, t-test                                          |                   | Dependent variables, proteins                             | SM HD4 vs Control, P value |
| Non-TIM23 imported | Mim1, TOM40+ SAM50          | VDAC1<br>VDAC2<br>SAM50<br>TOM70A<br>TOM40<br>TOM22 | 98.2<br>95.9<br>76.2<br>73.6<br>123.6<br>183.0 | 0.9278<br>0.6962<br>0.0113<br>0.1768<br>0.0769<br>0.0003 | 118               | VDAC1<br>VDAC2<br>SAM50<br>TOM70A<br>TOM22<br>SLC25A23 | 0.002                      | 89.8<br>85.8<br>57.6<br>53.2<br>113.9<br>91.1 | 0.5986<br>0.4531<br>0.0077<br>0.0597<br>0.5481<br>0.6780 | 88                | VDAC2<br>SAM50<br>TOM70A<br>TOM40<br>SLC25A23<br>SLC25A24 | 0.326                      |
|                    | TOM40+ TIM22                | SLC25A24<br>SLC25A23<br>SLC25A12<br>TIM23<br>TIM22  | 143.2<br>77.4<br>119.5<br>161.7<br>147.8       | 0.1057<br>0.3464<br>0.2396<br>0.0360<br>0.0052           |                   | SLC25A24<br>SLC25A12                                   |                            | 100.7<br>71.7<br>110.3<br>105.1<br>90.4       | 0.9765<br>0.0854<br>0.4861<br>0.4433<br>0.7160           |                   | SLC25A12<br>TIM23                                         |                            |
| TIM23 imported     | TOM40+ TIM23 Membrane bound | PHB<br>TIM50<br>TIM44<br>GPD2<br>ACADVL             | 97.1<br>76.3<br>41.9<br>90.8<br>73.1           | 0.8751<br>0.4604<br>0.1271<br>0.4114<br>0.1678           | 95                | TIM50<br>TIM44<br>GPD2<br>ACADVL<br>OTC                | 0.309                      | 104.2<br>48.7<br>66.9<br>101.2<br>73.6        | 0.6806<br>0.0516<br>0.0435<br>0.9299<br>0.3016           | 76                | PHB<br>TIM44<br>ACADVL<br>OTC<br>CLPP                     | 0.003                      |
|                    | TOM40+ TIM23 Matrix soluble | OTC<br>TUFM<br>IDH3A<br>CLPP<br>OAT<br>ME2          | 96.2<br>93.1<br>130.4<br>219.2<br>65.1<br>60.9 | 0.8486<br>0.5670<br>0.1821<br>0.0070<br>0.3642<br>0.1013 |                   | TUFM<br>CLPP<br>ME2                                    |                            | 35.8<br>89.0<br>97.0<br>84.7<br>64.2<br>65.8  | 0.0068<br>0.5790<br>0.8878<br>0.5665<br>0.1102<br>0.1423 |                   | ME2                                                       |                            |

note:

MANOVA P-value was for control vs. HD when considering the listed proteins together. NS – nonsynaptosomal mitochondria, SM – synaptosomal mitochondria additionally purified with MACS kit. One of the assumptions of MANOVA analysis is that there should be no collinearity among the dependent variables; thus, highly correlated dependent variables (correlation coefficient > 0.8) were removed from the comparison. Average (AVRG) per group – average value for group of TIM23-imported and non-TIM23 imported proteins.

Table S10. List of antibodies.

| Antibody           | Vendor                      | Catalog #  | Description       | Dilution | Notes      |
|--------------------|-----------------------------|------------|-------------------|----------|------------|
| Primary:           |                             |            |                   |          |            |
| Anti-polyglutamine | Millipore                   | MAB1574    | Mouse monoclonal  | 1:5000   |            |
| Anti-ACADVL        | AbCam                       | ab54698    | Mouse monoclonal  | 1:1000   | Hm samples |
| Anti-ACADVL        | AbCam                       | ab155138   | Rabbit polyclonal | 1:500    | Ms samples |
| Anti-ACO2          | AbCam                       | Ab110321   | Mouse monoclonal  | 1:2000   |            |
| Anti-ATP5A         | AbCam                       | ab14748    | Mouse monoclonal  | 1:5000   |            |
| Anti-CALR          | Millipore                   | MABT145    | Rabbit monoclonal | 1:10.000 |            |
| Anti-CAV2          | AbCam                       | ab133484   | Rabbit monoclonal | 1:5000   |            |
| Anti-CLPP          | AbCam                       | ab124822   | Rabbit monoclonal | 1:5000   |            |
| Anti-DIABLO        | AbCam                       | ab32023    | Rabbit monoclonal | 1:1000   |            |
| Anti-FLAG          | Sigma                       | F1804      | Mouse monoclonal  | 1:1000   |            |
| Anti-GAD1          | Sigma                       | SAB4501074 | Rabbit polyclonal | 1:1000   |            |
| Anti-GPD2          | AbCam                       | ab188585   | Rabbit monoclonal | 1:5000   |            |
| Anti-HTT           | AbCam                       | ab109115   | Rabbit monoclonal | 1:5000   |            |
| Anti-HTT           | Millipore                   | MAB2166    | Mouse monoclonal  | 1:1000   |            |
| Anti-IHD3A         | Proteintech                 | 15909-1-AP | Rabbit polyclonal | 1:1000   |            |
| Anti-LAMP1         | AbCam                       | ab13523    | Mouse monoclonal  | 1:1000   | Ms samples |
| Anti-LAMP1         | AbCam                       | ab108597   | Rabbit monoclonal | 1:1000   | Hm samples |
| Anti-ME2           | AbCam                       | ab139686   | Rabbit monoclonal | 1:5000   |            |
| Anti-MIA40         | Proteintech                 | 21090-1-AP | Rabbit polyclonal | 1:1000   |            |
| Anti-mtCO1         | AbCam                       | ab14705    | Mouse monoclonal  | 1:2000   |            |
| Anti-OAT           | AbCam                       | ab100845   | Mouse monoclonal  | 1:500    |            |
| Anti-OTC           | AbCam                       | ab228646   | Rabbit polyclonal | 1:1000   | Hm samples |
| Anti-OTC           | Sigma                       | HPA000243  | Rabbit polyclonal | 1:500    | Ms samples |
| Anti-polyQ         | Millipore                   | MAB1574    | Mouse monoclonal  | 1:1000   |            |
| Anti-RCAS1         | Cell Signaling              | #12290     | Rabbit monoclonal | 1:1000   |            |
| Anti-SAMM50        | AbCam                       | ab133709   | Rabbit monoclonal | 1:1000   |            |
| Anti-SLC25A23      | Santa Cruz<br>Biotechnology | sc-377109  | Mouse monoclonal  | 1:200    |            |
| Anti-SLC25A24      | AbCam                       | ab68796    | Mouse polyclonal  | 1:1000   | Hm samples |
| Anti-SLC25A12      | AbCam                       | Ab200201   | Rabbit monoclonal | 1:1000   |            |
| Anti-SLC25A10      | Millipore                   | MABN457    | Mouse monoclonal  | 1:1000   |            |
| Anti-TIMM22        | AbCam                       | Ab167423   | Rabbit monoclonal | 1:1000   |            |
| Anti-TIMM23        | BD Bioscience               | 611222     | Mouse monoclonal  | 1:2000   |            |
| Anti-TIMM44        | AbCam                       | ab194829   | Rabbit monoclonal | 1:1000   | Hm samples |
| Anti-TIMM44        | Proteintech                 | 66149-1-Ig | Mouse monoclonal  | 1:1000   | Ms samples |
| Anti-TIMM50        | AbCam                       | ab109436   | Rabbit monoclonal | 1:2000   |            |
| Anti-TOMM20        | Santa Cruz<br>Biotechnology | sc-11415   | Rabbit polyclonal | 1:2000   |            |
| Anti-TOMM22        | Proteintech                 | 11278-1-AP | Rabbit polyclonal | 1:1000   |            |
| Anti-TOMM40        | Santa Cruz<br>Biotechnology | D-2        | Mouse monoclonal  | 1:1000   | Hm samples |
| Anti-TOMM40        | Proteintech                 | 18409-1-AP | Rabbit polyclonal | 1:1000   | Ms samples |
| Anti-TOMM70A       | AbCam                       | ab83841    | Rabbit polyclonal | 1:1000   |            |

|                                 |           |           |                   |          |  |
|---------------------------------|-----------|-----------|-------------------|----------|--|
| Anti-TUBA                       | Sigma     | T5168     | Mouse monoclonal  | 1:10.000 |  |
| Anti-VDAC1                      | Millipore | AB10527   | Rabbit polyclonal | 1:2500   |  |
| Anti-VDAC2                      | AbCam     | ab155803  | Rabbit polyclonal | 1:1000   |  |
| Secondary:                      |           |           |                   |          |  |
| IRDye 800CW<br>Goat anti-Rabbit | Li-Cor    | 926-32211 | Goat              | 1:15.000 |  |
| IRDye 800CW<br>Goat anti-Mouse  | Li-Cor    | 926-32210 | Goat              | 1:15.000 |  |
| IRDye 680LT Goat<br>anti-Rabbit | Li-Cor    | 926-68021 | Goat              | 1:15.000 |  |
| IRDye 680LT Goat<br>anti-Mouse  | Li-Cor    | 926-68020 | Goat              | 1:15.000 |  |

## Materials and methods

**Plasmids and recombinant proteins preparation.** Plasmid constructs pGEX-4T3-HTT<sub>exon1-23Q</sub> and -HTT<sub>exon1-97Q</sub> for bacterial expression of GST-fused HTT fragments were generated as described (1). Recombinant mouse subunits of TIM23 complex (TIM23, TIM50, TIM17A, TIM17B) were generated by cDNA subcloning into pGEX-4T3 vector (GE Healthcare). GST-fused HTT exon 1 proteins (GST-HTT<sub>exon1-23Q</sub>, -97Q) and subunits of TIM23 complex (GST-TIM23, -TIM50, -TIM17A, -TIM17B), and GST control were purified from transformed One Shot™ BL21 Star™ (DE3) cells (Life Technologies) as described (1). GST-TIM23, GST-TIM50, GST-TIM17A, GST-TIM17B proteins bound to Glutathione Sepharose 4B beads (GE Healthcare) were digested with Thrombin protease (GE Healthcare) overnight at 25°C and eluted with PBS to remove GST proteins and concentrated using Amicon®Ultra-10K (Millipore) filter.

The wtHTT (HTT<sub>171-Q17</sub>) and mHTT (HTT<sub>171-Q68</sub>) fragments were overexpressed in HEK293t cells using pcDNA3.1+ vectors for eukaryotic expression encoding 171 amino acids long N-terminal sequence of human HTT labeled with flag-tag (DYKDDDDK) at the C-terminus.

**Mitochondria fractionation from cell lines.** Immediately prior to each experiment, cells were collected by trypsinization, washed twice in ice-cold low-salt buffer (138 mM NaCl, 2.7 mM KCl, 10 mM HEPES, pH 8 adjusted with NaOH) and subjected to mitochondria fractionation using Mitochondria Isolation MACS Kit (Miltenyi Biotec) according to the manufacturer's protocol. Briefly, cells were ruptured with 27G-needled syringe in ice-cold cell-lysis buffer provided with the kit (1 mL cell-lysis buffer per 10x10<sup>7</sup> cells) and incubated with iron nano-beads conjugated with anti-TOM22 antibody in provided buffer for 1 h at 4°C. The suspension was applied to a column placed in magnetic field of the MACS Separator, which retains magnetically labeled mitochondria. Mitochondria then were eluted with isolation buffer (225 mM Sucrose, 75 mM Mannitol, 10 mM HEPES, pH 8 adjusted with NaOH) upon column removal from the magnetic field and pelleted at 13,000 g for 4 min.

**Immunoblotting.** Mitochondrial lysates were used to prepare samples with Laemmli buffer (BioRad) augmented with 10% β-Mercaptoethanol (BioRad). Before loading into Bolt™ 4-12% Bis-Tris Plus gels (Invitrogen), samples were heated at 55°C for 10 min. Proteins were separated at 155 V in MES SDS Running buffer (Life Technologies) and transferred to Immobilon®-FL PVDF membrane (EMD Millipore) overnight at 35 V in 1X TG buffer (BioRad) supplemented with 10% methanol at 45 V and 4°C. PVDF membranes were blocked in SEA Blocking buffer (Thermo Scientific) for 1 h at ambient temperature. Primary antibodies were reconstituted in SEA Blocking buffer and incubated at 4°C overnight. The full list of primary antibodies and dilutions used in this study is indicated in *SI Appendix* Table S10. IRDye infrared fluorescent dye-labeled secondary antibodies (LI-COR Biosciences)

detectable at 700 or 800 nm were reconstituted (1:15.000) in SEA Blocking buffer and applied for 1 h at ambient temperature. All secondary antibodies are listed in *SI Appendix* Table S10. Both primary and secondary antibodies were washed 3 times with 1X PBST for 15 min per wash. Final PVFD-FL membranes were scanned on Odyssey CLx near-infrared fluorescence imager (LI-COR Biosciences) to visualize protein bands. The signal intensity of protein bands was analyzed in Image Studio Version 2.1 software. Images were converted to monochrome for presentation.

1. Yano H, *et al.* (2014) Inhibition of mitochondrial protein import by mutant huntingtin. *Nature neuroscience* 17(6):822-831.
